# Supplementary material for: The evolution of vertical climbing in primates: evidence from reaction forces
Source: Oxford University Press journal article supplement (doi:10.1242/jeb.157628), 2017-06-16
Supplement: jeb157628supp.pdf [file jeb157628supp.pdf]

**Table S1.** Sample sizes for captions of Figures 3 and 4.

| Figure 3 Peak Forces       | A                   |    |                    |    |                 |    | B             |    |               |    |              |    |
|----------------------------|---------------------|----|--------------------|----|-----------------|----|---------------|----|---------------|----|--------------|----|
|                            | Climbing Propulsive |    | Walking Propulsive |    | Walking Braking |    | Climbing Push |    | Climbing Pull |    | Walking Push |    |
|                            | FL                  | HL | FL                 | HL | FL              | HL | FL            | HL | FL            | HL | FL           | HL |
| <i>L. tardigradus</i>      | 27                  | 33 | 5                  | 7  | 5               | 7  | 16            | 17 | 10            | 18 | 5            | 7  |
| <i>C. medius</i>           | 46                  | 56 | 7                  | 6  | 7               | 6  | 14            | 47 | 33            | 12 | 7            | 6  |
| <i>N. pygmaeus</i>         | 50                  | 50 | 14                 | 8  | 14              | 8  | 28            | 47 | 33            | 8  | 14           | 8  |
| <i>S. sciureus</i>         | 12                  | 18 | 51                 | 27 | 51              | 27 | 7             | 14 | 7             | 6  | 51           | 27 |
| <i>A. nancymae/nyanze</i>  | 16                  | 16 | 12                 | 16 | 12              | 16 | 4             | 16 | 13            | 3  | 17           | 19 |
| <i>D. madagascariensis</i> | 61                  | 74 | 11                 | 7  | 11              | 7  | 11            | 68 | 59            | 9  | 19           | 13 |
| <i>M. fascicularis</i>     | 8                   | 28 | 46                 | 28 | 46              | 28 | 2             | 28 | 7             | 2  | 46           | 28 |

| Figure 4 Impulse Forces    | A                   |    |                    |    |                 |    | B             |    |               |    |              |    | C                      |    |                                |    |
|----------------------------|---------------------|----|--------------------|----|-----------------|----|---------------|----|---------------|----|--------------|----|------------------------|----|--------------------------------|----|
|                            | Climbing Propulsive |    | Walking Propulsive |    | Walking Braking |    | Climbing Push |    | Climbing Pull |    | Walking Push |    | Climbing Net Push/Pull |    | Walking Net Propulsive/Braking |    |
|                            | FL                  | HL | FL                 | HL | FL              | HL | FL            | HL | FL            | HL | FL           | HL | FL                     | HL | FL                             | HL |
| <i>L. tardigradus</i>      | 4                   | 11 | 3                  | 6  | 3               | 7  | 2             | 5  | 2             | 6  | 3            | 7  | 4                      | 11 | 3                              | 7  |
| <i>C. medius</i>           | 32                  | 40 | 1                  | 1  | 2               | 1  | 10            | 32 | 22            | 9  | 2            | 1  | 32                     | 39 | 2                              | 1  |
| <i>N. pygmaeus</i>         | 27                  | 23 | 11                 | 7  | 11              | 7  | 15            | 21 | 18            | 6  | 11           | 7  | 27                     | 23 | 11                             | 7  |
| <i>S. sciureus</i>         | 10                  | 17 | 51                 | 27 | 51              | 27 | 5             | 13 | 6             | 6  | 51           | 27 | 10                     | 17 | 51                             | 27 |
| <i>A. nancymae/nyanze</i>  | 13                  | 12 | 12                 | 16 | 12              | 16 | 3             | 12 | 12            | 1  | 12           | 16 | 13                     | 12 | 12                             | 16 |
| <i>D. madagascariensis</i> | 51                  | 62 | 11                 | 7  | 11              | 7  | 6             | 56 | 47            | 8  | 11           | 7  | 51                     | 62 | 11                             | 7  |
| <i>M. fascicularis</i>     | 6                   | 23 | 46                 | 28 | 46              | 28 | 0             | 23 | 6             | 1  | 46           | 28 | 6                      | 23 | 46                             | 28 |
